# Supplementary material
Source: PubMed Central journal article supplement (PMC3522153)
Supplement: 9fcd1a716a043fa2fdc9971aac2bfe49_genetics.112.144477-1.pdf [file 9fcd1a716a043fa2fdc9971aac2bfe49_genetics.112.144477-1.pdf]

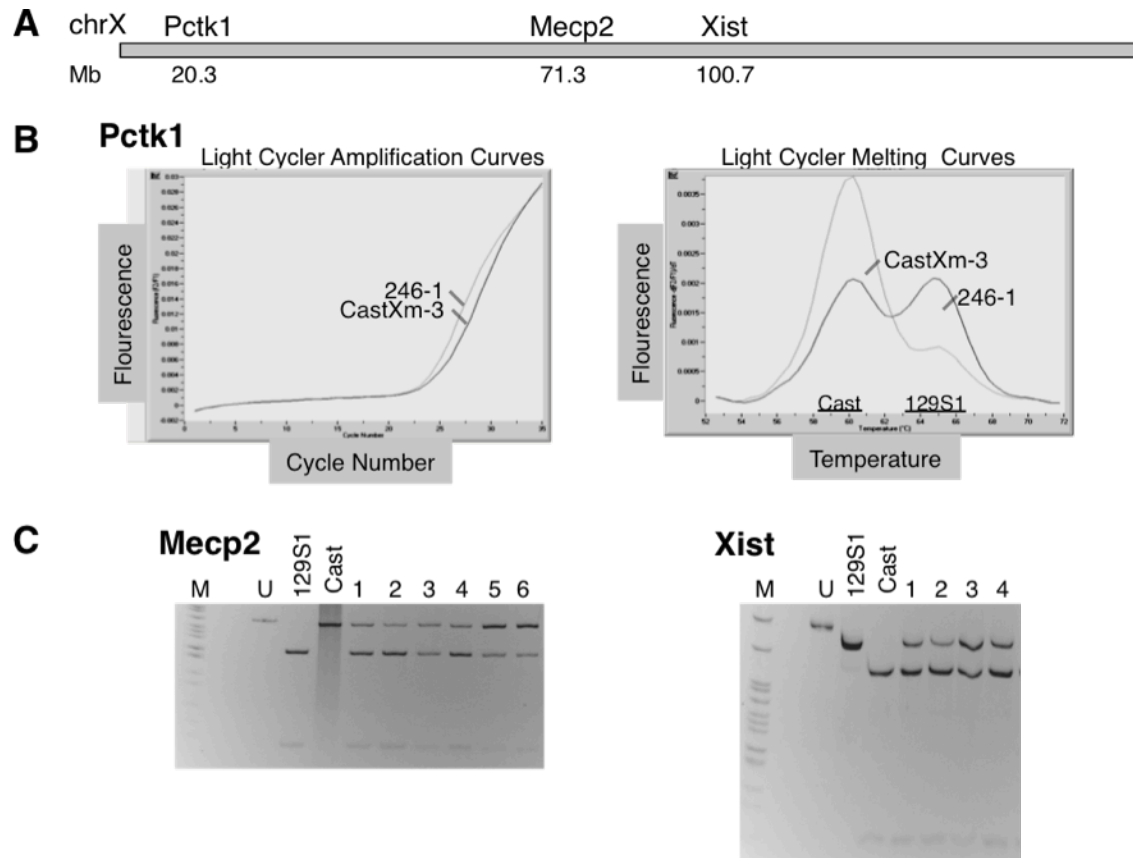

**Figure S1** Allele-specific Expression Assays to Measure the X Inactivation Ratio. **(A)** Location of genes on the X chromosome with assays for allele-specific expression. **(B)** *Pctk1* analysis using previously described Light Cycler Assay (PERCEC *et al.* 2002). The left panel shows the amplification curve of two control progeny samples: CastXm-3 is heterozygous for entire X chromosome; 246-1 is homozygous for 129S1 for the entire X chromosome except for the proximal end of the paternal X chromosome, which is Cast. The right panel

depicts the corresponding melting curves: peak at 60°C corresponds to the Cast allele product; peak at 65°C corresponds to 129S1 allele product. Peak heights were used to calculate the X inactivation ratio ( $129S1 / (Cast + 129S1)$ ). The ratio for CastXm-3 = 0.23; the ratio for 246-1 = 0.50. **(C)** *Mecp2* and *Xist* assays using RFLPs. Lanes shown are pBR322 DNA-*MspI* Digest (M), uncut PCR product (U) and cut PCR product (using *Tsp509I* for *Mecp2* and *SmlI* for *Xist*) for control and RX2 progeny samples. *Mecp2 Tsp509I* 129S1 digested fragment is 217 bp and Cast digested fragments are 155 bp and 62 bp. *Xist SmlI* 129S1 digested fragments are 279 bp, 82 bp and 24 bp, and the Cast digested fragments are 361 bp and 24 bp. Progeny tested in lanes 1-6 are CastXm-1, CastXm-7, 6443-1, 6443-3, 3695-1 and 3695-2, respectively. The ratio as measured by *Mecp2* for corresponding lanes are 0.31 (1), 0.22 (2), 0.40 (3), 0.28 (4), 0.58 (5) and 0.62 (6), and as measured by *Xist* for corresponding lanes are 0.31 (1), 0.21 (2), 0.46 (3) and 0.33 (4). Progeny tested in **(B)** and lanes 1-6 in **(C)** were from control or RX2-derived male mated with 129S1 female.



**Table S2 PCR primers and conditions**

| Gene or X Chr Location | Primer     | Sequence 5' to 3'         | NCBI SNP /Polymorphism | Product size /SNP location | Restriction site | Allele specific fragments (bp) | PCR conditions (Anneal Temp. /cycle number) |
|------------------------|------------|---------------------------|------------------------|----------------------------|------------------|--------------------------------|---------------------------------------------|
| <b>Hprt1 cDNA</b>      | Hprt F3    | TGCTGACCTGCTGGATTACA      | ss46946097             | 303bp                      | SfaNI            | 303-129S1                      | 61°C                                        |
|                        | Hprt R2    | GGCCTGTATCCAACACTTCG      | A-129/G-Cast Exon6     | 201bp                      |                  | 192,111-Cast                   | 26-28 cycles                                |
| <b>Mecp2 cDNA</b>      | Mecp2F3    | CCAGTTCCTGCTTTGATGTG      | NA                     | 217bp                      | Tsp509I          | 217-129S1                      | 58°C                                        |
|                        | Mecp2R3    | TTGTAGTGGCTCATGCTTGC      | G-129/A-Cast           | 157bp                      |                  | 155,62-Cast                    | 26-28 cycles                                |
| <b>Eda</b>             | X97.59f    | AGAGGCATTCTTGCTGCATT      | ss38410803             | 156bp                      | StyI             | 156-129S1                      | 57°C                                        |
|                        | X97.59r    | TAGGCATGCATGTGGTCATT      | G-129S1,C-Cast         | 120bp                      |                  | 120,36-Cast                    | 35 cycles                                   |
| <b>X99.35MB</b>        | X99.35f    | CGGTTGGCGAGTTAGAAAGA      | ss38408987             | 250bp                      | Tsp45I           | 93,157-129S1                   | 57°C                                        |
|                        | X99.35r    | CTGGCCGAGAGTTACCTGAG      | G-129S1,T-Cast         | 96bp                       |                  | 250-Cast                       | 35 cycles                                   |
| <b>Tsx</b>             | Tsx g1f    | ATCATTTATTTGGCCCCTGA      | ss49779081             | 209pb                      | ApeKI            | 129,80-129S1                   | 57°C                                        |
|                        | Tsx g2r    | AGCTTGGCAAGTGCCTCAT       | T-129S1,C-Cast Exon4   | 131bp                      |                  | 209-Cast                       | 35 cycles                                   |
| <b>Xist cDNA</b>       | Xist E2F1  | TGGAGTCTGTTTTGTGCTCCTGCC  | ss38407831             | 385bp                      | SmlI             | 24,82,279-129S1                | 58°C                                        |
|                        | Xist E4R1  | CCTTGCTGGGTTTCAGGAAAGCGTC | G-129S1,A-Cast Exon3   | 106bp                      |                  | 24,361-Cast                    | 26-28 cycles                                |
| <b>Xist</b>            | Xist IN2F1 | TCCGTTACTTGGTTGACTGAGA    | ss38407831             | 245bp                      | SmlI             | 168,77-129S1                   | 57°C                                        |
|                        | Xist E3R3  | TG TTCAGAGTAGCGAGGACTTG   | G-129S1,A-Cast Exon3   | 168bp                      |                  | 245-Cast                       | 35 cycles                                   |
| <b>Xist-LC Exon1</b>   | XistF2     | CTCGTTTCCCGTGGATGTG       | NA                     | 489bp                      | No site          | NA                             | 57°C                                        |
|                        | XistR2     | CCGATGGGCTAAGGAGAAG       | A-129S1,T-Cast Exon1   | 172bp                      |                  |                                | 35 cycles                                   |
| <b>XChr100.69MB</b>    | X100.69f   | ATATAGCGCCCGAGACTCAA      | ss38407822             | 165bp                      | TaqαI            | 165-129S1                      | 57°C                                        |
|                        | X100.69r   | TCTCGTTGGGACCACACATA      | C-129, T-Cast          | 63bp                       |                  | 63,102-Cast                    | 35 cycles                                   |
| <b>XChr100.7MB</b>     | X100.7f    | TTTCTCCTGTGTGATAGGGTCTT   | ss49779045             | 158bp                      | Bsrl             | 60,98-129S1                    | 57°C                                        |
|                        | X100.7r    | AGGAAGTACCCAGGCTCCTC      | T-129, G-Cast          | 64bp                       |                  | 158-Cast                       | 35 cycles                                   |
| <b>Abcb7 cDNA</b>      | Abc F4     | TTCGAAAAGCACAAAGCATTC     | NA                     | 219bp                      | Hsp92II          | 51,158,10-129S1                | 58°C                                        |
|                        | Abc R4     | TATCAATGGCCATGTCTGGA      | G 129S1,C Cast Exon1   | 51bp                       |                  | 209,10-Cast                    | 26-28 cycles                                |
| <b>Jarid1c cDNA</b>    | Jarid F5   | TTCCCGAGGAGATGAAGATG      | ss38488639             | 291bp                      | Hpy188I          | 292-129S1                      | 58°C                                        |
|                        | Jarid R2   | CCGCCAAAACCTCTTCTCTA      | C-129S1,T-Cast Exon 8  | 94bp                       |                  | 96,196-Cast                    | 26-28 cycles                                |
| NA Not Applicable      |            |                           |                        |                            |                  |                                |                                             |
